# Supplementary material for: Antibacterial thyme oil-loaded zwitterionic emulsion hydrogels
Source: Royal Society of Chemistry journal article supplement (doi:10.1039/d1tb02853g), 2022-01-01
Supplement: d1tb02853g1.pdf [file d1tb02853g1.pdf]

## Supporting Information

### Antibacterial Thyme Oil-Loaded Zwitterionic Emulsion Hydrogels

Gangchen Lu, ‡<sup>ab</sup> Xin Shen, ‡<sup>ab</sup> Dongdong Xiao, <sup>c</sup> Liduo Rong, <sup>ab</sup> Zhiping Mao, <sup>abd</sup>

Bijia Wang, <sup>a</sup> Xiaofeng Sui\*, <sup>ab</sup> Meixin Zhao <sup>\*c</sup> and Xueling Feng <sup>\*abd</sup>

*a. Key Lab of Science and Technology of Eco-Textile, Ministry of Education, College of Chemistry, Chemical Engineering and Biotechnology, Donghua University, Shanghai 201620, People's Republic of China*

*b. National Engineering Research Center for Dyeing and Finishing of Textiles, Donghua University, Shanghai, 201620, People's Republic of China*

*c. Department of Urology and Andrology, Renji Hospital, School of Medicine, Shanghai Jiaotong University, Shanghai, 200001, People's Republic of China*

*d. National Manufacturing Innovation Center of Advanced Dyeing and Finishing Technology, Tai'an, Shandong, 271000, People's Republic of China*

*e. Department of Nuclear Medicine, Peking University Third Hospital, Beijing, 100191, People's Republic of China*

‡ These authors contributed equally.

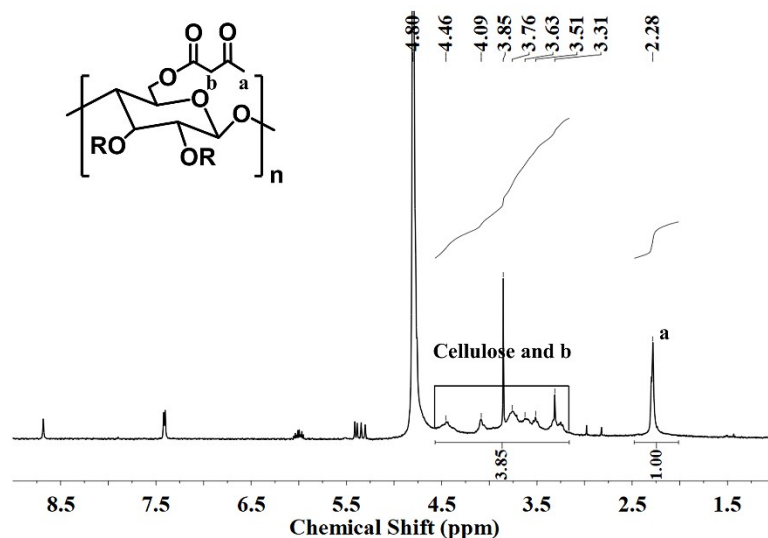

Fig. S1  $^1\text{H}$  NMR spectrum of CAA

### $^1\text{H}$ NMR spectra

First, the CAA was dissolved in 0.55 mL  $\text{D}_2\text{O}$ . And then, NMR spectra were conducted with a Bruker DRX-400 MHz spectrophotometer in the proton noise-decoupling mode with a standard 5 mm probe.

The signal at  $\delta = 2.28$  ppm is attributed to the methyl group of acetoacetate. The signal in the range of  $\delta = 3.2\text{--}4.5$  ppm is attributed to the backbone of the anhydroglucose ring and the methylenes of acetoacetate.

The degree of substitution (DS) of CAA is calculated according to improved Equation (1) as follows:

$$DS = \frac{I_1 \times 9}{I_2 \times 3} = \frac{3I_1}{I_2}$$

where  $I_1$  is the integral value of methyls of acetoacetate and  $I_2$  is the integration value of backbone of the anhydroglucose ring and the methylenes of acetoacetate in CAA.

Table. S1 Compositions of O/W emulsion hydrogels

| Sample code | CAA (mL) | SBMA (g) | MBA (mg) | $\text{H}_2\text{O}_2$ ( $\mu\text{L}$ ) | HRP (mg) | Thyme oil (mL) |
|-------------|----------|----------|----------|------------------------------------------|----------|----------------|
| H-0%        | 1.4      | 0.6      | 6        | 4                                        | 0.4      | 0              |
| H-20%       | 1.4      | 0.6      | 6        | 4                                        | 0.4      | 0.35           |
| H-40%       | 1.4      | 0.6      | 6        | 4                                        | 0.4      | 0.934          |

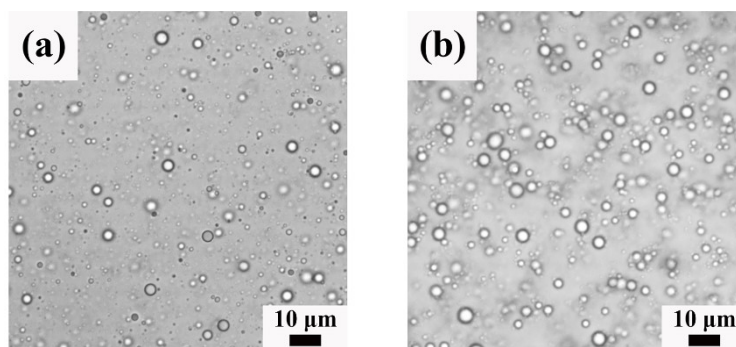

**Fig. S2** Optical micrographs of the fresh O/W emulsions with the thyme oil phase fraction of (b) 20% and (c) 40% (The diluted version of **Fig. 3b&c**).

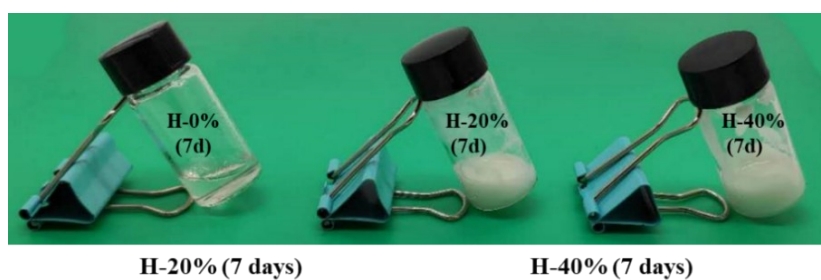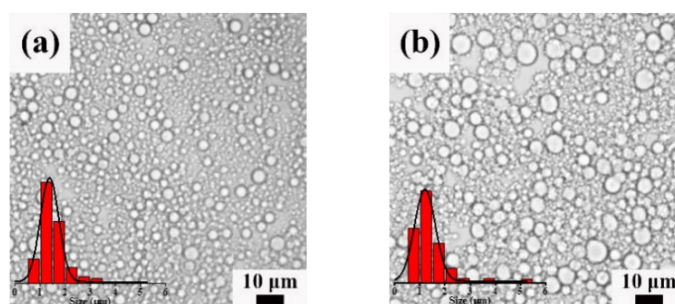

**Fig. S3** Digital photographs and optical micrographs of O/W emulsions stored for one week with the thyme oil phase fraction of (a) 20% and (b) 40%.

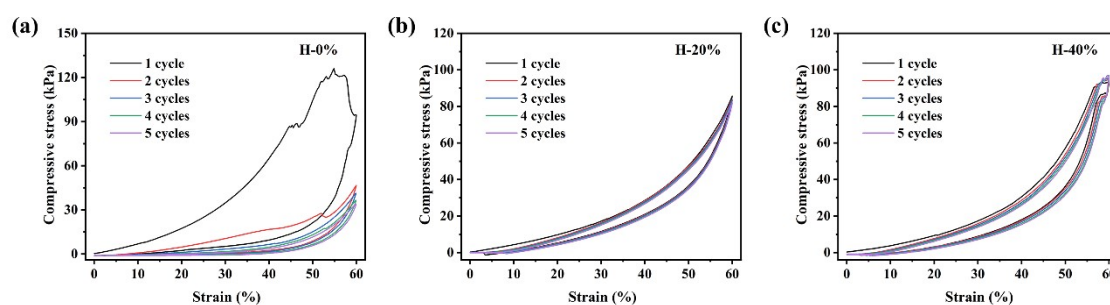

**Fig. S4** Compressive stress-strain curves of (a) H-0%, (b) H-20%, and (c) H-40% with 5 cycles.

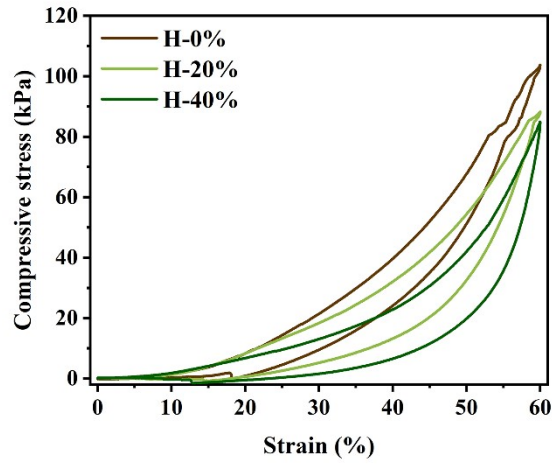

**Fig. S5** Compressive stress-strain curves of H-0%, H-20%, and H-40% after swelling and releasing thyme oil in PBS solution for 48 hours.

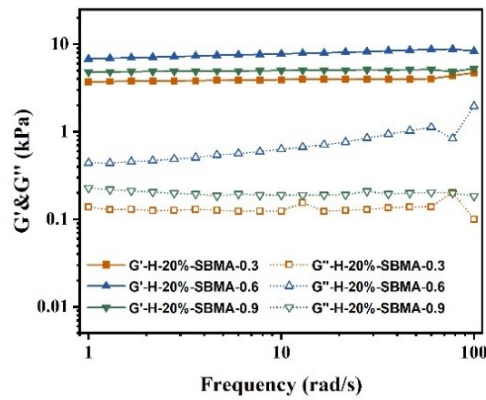

**Fig. S6** Rheological behavior of H-20% hydrogel with different SBMA content during oscillatory frequency sweep.

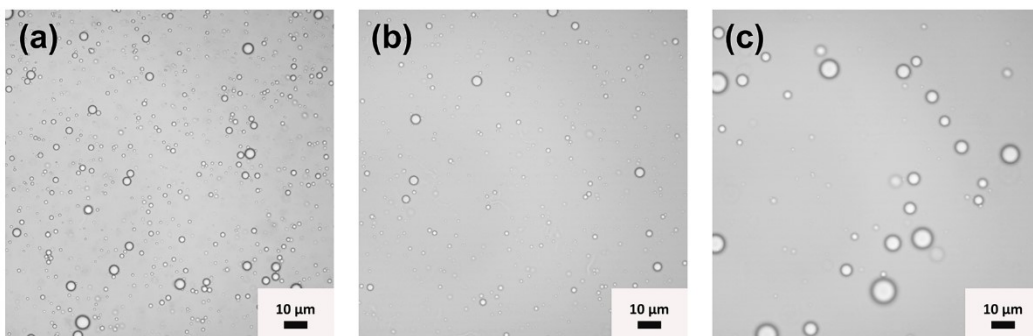

**Fig. S7** Optical micrographs of O/W emulsions with the SBMA dosage of (a) 0.3g, (b) 0.6g and (c) 0.9g

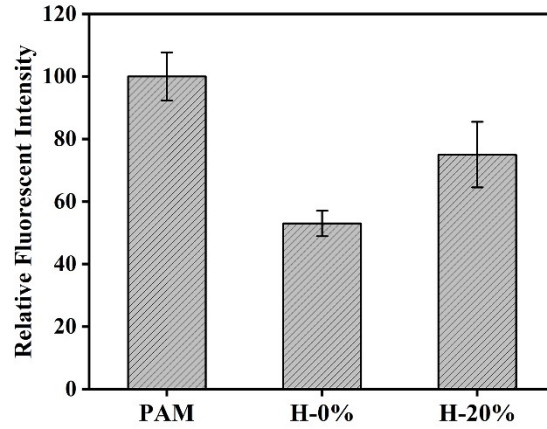

**Fig. S8** The fluorescence intensity data of PAM, H-0%, and H-20%.

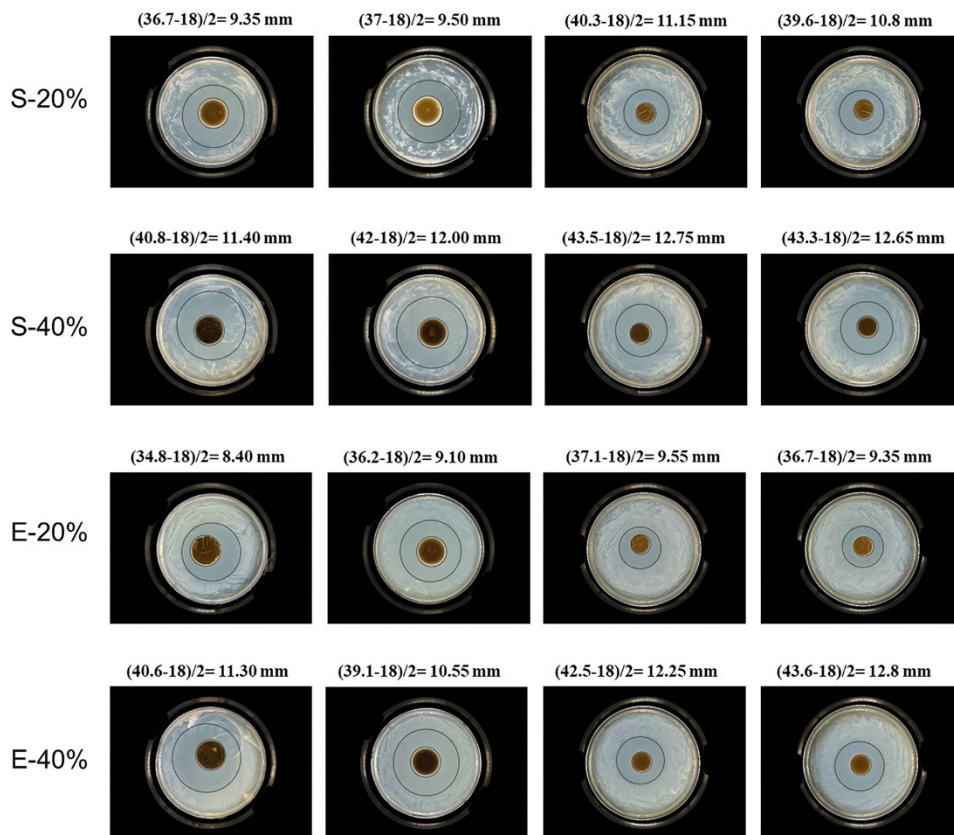

**Fig. S9** The pictures of repeatable antibacterial experimental results against *S. aureus* and *E. coli*, and the corresponding statistical analysis of ZOI value.
